# Supplementary material for: A comparison of political violence by left-wing, right-wing, and Islamist extremists in the United States and the world
Source: PubMed Central journal article supplement — Proc Natl Acad Sci U S A. 2022 Jul 18;119(30):e2122593119. doi: 10.1073/pnas.2122593119 (PMC9335287; doi:10.1073/pnas.2122593119), 2022-07-18
Supplement: pnas.2122593119.sapp.pdf [file pnas.2122593119.sapp.pdf]

1  
2  
3  
4  
5  
6  
7  
8  
9  
10  
11  
12  
13  
14  
15  
16  
17  
18  
19  
20  
21  
22  
23  
24  
25  
26  
27  
28  
29  
30  
31  
32

**Supplementary Information for**

A comparison of political violence by left-wing, right-wing and Islamist extremists in the United States and the world

Katarzyna Jasko

Institute of Psychology, Jagiellonian University, Poland 30-060

Gary LaFree

Department of Criminology and Criminal Justice, University of Maryland, College Park, MD, 20742

James Piazza

Department of Political Science, The Pennsylvania State University, University Park, PA 16801

Michael H. Becker

Department of Justice, Law, and Criminology, American University, Washington, DC, 20016

Katarzyna Jasko Email: [katarzyna.jasko@uj.edu.pl](mailto:katarzyna.jasko@uj.edu.pl)

**This PDF file includes:**

Tables S1 to S5

33 Table S1. Comparison of individuals representing different ideological groups.

| <i>Variable</i>             | <i>Categories</i>                                             | <i>Right-wing</i>  | <i>Islamists</i>   | <i>Left-wing</i>   | <i>p (Chi-square test)</i> | <i>Cramer's V</i> |
|-----------------------------|---------------------------------------------------------------|--------------------|--------------------|--------------------|----------------------------|-------------------|
| <b>Education</b>            | Up to high school (1)                                         | 53%                | 42%                | 21%                | <.001                      | .29               |
|                             | College or vocational education (some or complete degree; (2) | 40%                | 47%                | 58%                |                            |                   |
|                             | Post-graduate education (some or complete degree; (3)         | 7%                 | 11%                | 21%                |                            |                   |
| <b>Marital status</b>       | Yes (married)                                                 | 62%                | 59%                | 76%                | <.001                      | .14               |
|                             | No                                                            | 38%                | 41%                | 24%                |                            |                   |
| <b>Immigrant background</b> | Yes                                                           | 0.2%               | 45%                | 3%                 | <.001                      | .60               |
|                             | No                                                            | 99.8%              | 55%                | 97%                |                            |                   |
| <b>Military experience</b>  | Yes                                                           | 23%                | 11%                | 10%                | <.001                      | .18               |
|                             | No                                                            | 77%                | 89%                | 90%                |                            |                   |
| <b>Gender</b>               | Male                                                          | 94%                | 91%                | 75%                | <.001                      | .26               |
|                             | Female                                                        | 6%                 | 9%                 | 25%                |                            |                   |
| <b>Age<sup>1</sup></b>      |                                                               | 37.56 <sup>a</sup> | 31.22 <sup>b</sup> | 29.68 <sup>b</sup> | <.001                      |                   |
| <b>Ethnicity (white)</b>    | Yes                                                           | 95%                | 9%                 | 70%                | <.001                      | .67               |

|                                             |         |     |     |     |       |     |
|---------------------------------------------|---------|-----|-----|-----|-------|-----|
|                                             | No      | 5%  | 81% | 30% |       |     |
| <b>Previous violent criminal experience</b> | Yes     | 27% | 17% | 16% | <.001 | .13 |
|                                             | No      | 73% | 83% | 84% |       |     |
| <b>Decades</b>                              | 40s-60s | 5%  | 0%  | 17% | <.001 |     |
|                                             | 70s     | 4%  | 0%  | 26% |       |     |
|                                             | 80s     | 12% | 0%  | 8%  |       |     |
|                                             | 90s     | 21% | 1%  | 10% |       |     |
|                                             | 00s     | 22% | 38% | 21% |       |     |
|                                             | 10s     | 36% | 61% | 18% |       |     |

34 <sup>†</sup> Means with different superscripts are significantly different from each other.

35

36 Table S2. Logistic Regression Model (Study 1; Left-wing ideology as a reference category).

|                                         | <i>b</i> | <i>SE</i> | <i>OR</i> | <i>p</i> | <i>b</i> | <i>SE</i> | <i>OR</i> | <i>p</i> |
|-----------------------------------------|----------|-----------|-----------|----------|----------|-----------|-----------|----------|
| (Intercept)                             | -0.72    | 0.11      | 0.49      | <.001    | -0.71    | 0.44      | 0.49      | .111     |
| Islamist ideology                       | 1.20     | 0.17      | 3.32      | <.001    | 2.15     | 0.31      | 8.55      | <.001    |
| Right-wing ideology                     | 1.15     | 0.13      | 3.17      | <.001    | 1.70     | 0.21      | 5.50      | <.001    |
| Education (2)                           |          |           |           |          | -0.08    | 0.52      | 0.92      | .877     |
| Education (3)                           |          |           |           |          | -0.56    | 0.47      | 0.57      | .252     |
| Marital status                          |          |           |           |          | -0.30    | 0.19      | 0.74      | .116     |
| Immigrant background                    |          |           |           |          | -0.68    | 0.29      | 0.51      | .020     |
| Military experience                     |          |           |           |          | -0.10    | 0.21      | 0.91      | .643     |
| Gender (male)                           |          |           |           |          | 0.18     | 0.24      | 1.20      | .449     |
| Age                                     |          |           |           |          | -0.01    | 0.01      | 0.99      | .089     |
| Ethnicity (white)                       |          |           |           |          | -0.43    | 0.21      | 0.65      | .045     |
| Previous violent criminal<br>experience |          |           |           |          | 1.08     | 0.21      | 2.95      | <.001    |
| 60s                                     |          |           |           |          | 0.56     | 0.31      | 1.74      | .072     |
| 70s                                     |          |           |           |          | 1.39     | 0.30      | 4.01      | <.001    |
| 80s                                     |          |           |           |          | 0.94     | 0.28      | 2.56      | .001     |
| 90s                                     |          |           |           |          | 0.24     | 0.22      | 1.27      | .291     |
| 00s                                     |          |           |           |          | -0.50    | 0.18      | 0.60      | .006     |

37 Note: The reference category for these models are individuals who identified as left-wing, achieved a high school or less  
 38 education (Education 1), were not married, not an immigrant, did not have any military experience, did not engage in any  
 39 previous criminal violence, and whose exposure event occurred in the 2010's. Significance here is determined using a two-  
 40 tailed t-test based upon 50 pooled samples with the multivariate imputation through chained equations method.

41 Table S3. Distribution of Right-wing, Left-wing, and Islamist Attacks Over Time (Study 2).

| <b>Decades</b>      |                   | <b>70s</b> | <b>80s</b> | <b>90s</b> | <b>00s</b> | <b>10s</b> |
|---------------------|-------------------|------------|------------|------------|------------|------------|
| Right-wing ideology | N                 | 232        | 2159       | 1055       | 273        | 416        |
|                     | % within ideology | 5.6%       | 52.2%      | 25.5%      | 6.6%       | 10%        |
| Left-wing ideology  | N                 | 2 982      | 12 525     | 6 531      | 2 675      | 7 531      |
|                     | % within ideology | 9.2%       | 38.8%      | 20.3%      | 8.3%       | 23.4%      |
| Islamist ideology   | N                 | 50         | 344        | 2 168      | 4 944      | 28 094     |
|                     | % within ideology | 0.1%       | 1%         | 6.1%       | 13.9%      | 78.9%      |

42

43

44 Table S4. Analysis of Fatalities in Global Terrorism Database (Study 2; after excluding  
 45 generic groups from analyses)

|                                   | Zero-inflated negative binomial |           |                                  |                                     |
|-----------------------------------|---------------------------------|-----------|----------------------------------|-------------------------------------|
|                                   | Logistic regression             |           | model                            |                                     |
|                                   | <i>b</i>                        | <i>OR</i> | Conditional<br>model<br><i>b</i> | Zero-inflation<br>model<br><i>b</i> |
| Intercept                         | -0.39                           | 0.67      | -0.26                            | -2.13                               |
| Left-wing ideology                | -0.69                           | 0.50***   | -0.39                            | 0.66***                             |
| Islamist ideology                 | 0.50                            | 1.64*     | 1.27***                          | -17.62                              |
| Random part                       |                                 |           |                                  |                                     |
| Intercept Variance<br>(groups)    | 1.29                            |           | 1.79                             |                                     |
| Intercept Variance<br>(countries) | 0.73                            |           | 1.03                             |                                     |
| Deviance                          | 72133.9                         |           | 244917.7                         |                                     |
| Observations                      | N: 60,547                       |           | N: 60,547                        |                                     |
|                                   | Groups: 468                     |           | Groups: 468                      |                                     |
|                                   | Countries: 111                  |           | Countries: 111                   |                                     |

46 \*  $p < .05$ ; \*\*  $p < .01$ ; \*\*\*  $p < .001$

47

48

49 Table S5. Analysis of Injuries in Global Terrorism Database (Study 2)

|                                   | Zero-inflated negative binomial |           |                               |                                  |
|-----------------------------------|---------------------------------|-----------|-------------------------------|----------------------------------|
|                                   | Logistic regression             |           | model                         |                                  |
|                                   | <i>b</i>                        | <i>OR</i> | Conditional model<br><i>b</i> | Zero-inflation model<br><i>b</i> |
| Constant                          | -1.30                           | 0.27      | 0.25                          | -0.36                            |
| Left-wing ideology                | -0.24                           | 0.79      | -0.39                         | -0.22*                           |
| Islamist ideology                 | 1.18                            | 3.25***   | 1.36***                       | -17.67                           |
| Random part                       |                                 |           |                               |                                  |
| Intercept Variance<br>(groups)    | 0.58                            |           | 1.27                          |                                  |
| Intercept Variance<br>(countries) | 0.18                            |           | 0.48                          |                                  |
| Deviance                          | 75567.8                         |           | 208576.4                      |                                  |
| Observations                      | N: 63,810                       |           | N: 63,810                     |                                  |
|                                   | Groups: 523                     |           | Groups: 523                   |                                  |
|                                   | Countries: 128                  |           | Countries: 128                |                                  |

50 \*  $p < .05$ ; \*\*  $p < .01$ ; \*\*\*  $p < .001$

51 Note: Due to the way fatalities and injuries are coded in GTD we consider fatalities as the primary  
52 variable. Specifically, if the source noted that the attack had resulted in fatalities but it did not mention any  
53 injuries, the variable “injuries” was coded as 0 (suggesting that no people were injured). Similarly, when  
54 the source noted that the attack had resulted in injuries but it did not mention any fatalities, “0” was  
55 assigned to fatalities. Given the different level of visibility and clarity as to who is counted as killed vs.  
56 injured, we think that it is less likely that the data miss real fatalities (and inaccurately assign “0”) than it is  
57 that the data miss real injuries (and inaccurately assign “0”). In support of this interpretation, 37% of cases  
58 in GTD report no fatalities or injuries and 25% of cases report both fatalities and injured victims. However,  
59 among the inconsistent cases (i.e., fatalities but 0 injuries or injuries but 0 fatalities), 11% are attacks that

60 mention injuries but 0 fatalities, but 27% are attacks that mention fatalities but 0 injuries. Such selective  
61 attacks that result only in fatalities but no injuries seem to be less likely. In short, we suggest that the  
62 number of injuries might be underestimated (and the number of true zero injuries overestimated) and  
63 misrepresent the actual numbers more so in the case of injuries than fatalities.

64
